# Supplementary material
Source: HighWire-hosted journal article supplement (https://erj.ersjournals.com/content/57/2/2002524)
Supplement: inline-supplementary-material-1 [file inline-supplementary-material-1.pdf]

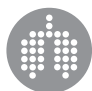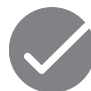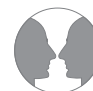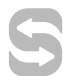

SHAREABLE PDF

# Continuous positive airway pressure in COVID-19 patients with moderate-to-severe respiratory failure

Claudia Brusasco<sup>1</sup>, Francesco Corradi <sup>1,2</sup>, Antonia Di Domenico<sup>3</sup>,  
Francesca Raggi<sup>4</sup>, Graziano Timossi<sup>4</sup>, Gregorio Santori<sup>5</sup> and Vito Brusasco<sup>6</sup>, for  
the Galliera CPAP-Covid-19 study group<sup>7</sup>

**Affiliations:** <sup>1</sup>Anaesthesia and Intensive Care Unit, E.O. Ospedali Galliera, Genoa, Italy. <sup>2</sup>Dept of Surgical, Medical, Molecular Pathology and Critical Care Medicine, University of Pisa, Pisa, Italy. <sup>3</sup>Dept of Urology, E.O. Ospedali Galliera, Genoa, Italy. <sup>4</sup>Dept of Internal Medicine, E.O. Ospedali Galliera, Genoa, Italy. <sup>5</sup>Dept of Surgical Sciences and Integrated Diagnostics (DISC), University of Genoa, Genoa, Italy. <sup>6</sup>Dept of Experimental Medicine, University of Genoa, Genoa, Italy. <sup>7</sup>A list of collaborators from the Galliera CPAP-Covid-19 study group can be found in the Acknowledgements section.

**Correspondence:** Claudia Brusasco, Anaesthesia and Intensive Care Unit, E.O. Ospedali Galliera, Mura della Cappuccine 14, 16128 Genoa, Italy. E-mail: claudia.brusasco@gmail.com

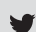

@ERSpublications

**CPAP can be successfully used in a number of COVID-19 patients with hypoxaemic respiratory failure and gas exchange and radiological findings similar to those generally considered to be indications for invasive mechanical ventilation** <https://bit.ly/2GpBx6a>

**Cite this article as:** Brusasco C, Corradi F, Di Domenico A, *et al.* Continuous positive airway pressure in COVID-19 patients with moderate-to-severe respiratory failure. *Eur Respir J* 2021; 57: 2002524 [<https://doi.org/10.1183/13993003.02524-2020>].

This single-page version can be shared freely online.

## To the Editor:

Noninvasive ventilation (NIV) and continuous positive airway pressure (CPAP) are recommended for acute hypoxaemic respiratory failure (AHRF) due to cardiogenic pulmonary oedema but no recommendation has been made for viral pandemics, because of the lack of randomised studies showing their efficacy and concerns of infection dissemination [1]. Early after the coronavirus disease 2019 (COVID-19) outbreak in Italy, there was an expert consensus in favour of CPAP and NIV as first-line treatments for the associated AHRF [2]. However, few studies used unspecified NIV in a minority of patients without detailed results [3–5]. CPAP was the object of two short reports with differing results [6, 7]. Thus, their value in COVID-19 remains to be established.
